Title: Comparative metagenome-assembled genome analysis of *Lachnovaginosum* genomospecies, formerly known as BVAB1

Authors: Johanna B. Holm<sup>1</sup>, Michael France<sup>1</sup>, Bing Ma<sup>1</sup>, Courtney K. Robinson<sup>2</sup>, Elias McComb<sup>2</sup>, Rebecca M. Brotman<sup>3</sup>, Jacques Ravel<sup>1</sup>

Affiliations:

<sup>1</sup> Institute for Genome Sciences and Department of Microbiology and Immunology, University of Maryland School of Medicine, Baltimore, Maryland.

<sup>2</sup> Institute for Genome Sciences, University of Maryland School of Medicine, Baltimore, Maryland.

<sup>3</sup> Institute for Genome Sciences and Department of Epidemiology and Public Health, University of Maryland School of Medicine, Baltimore, Maryland.

## Abstract

Bacterial Vaginosis Associated Bacteria 1 (BVAB1) is an uncultured bacterial species found in the human vagina that belongs to the family *Lachnospiraceae* within the order *Clostridiales*, and as its name suggests, is often associated with bacterial vaginosis (BV). In reproductive health, BV is of concern due to its associated risk for HIV, *Chlamydia trachomatis*, and *Neisseria gonorrhoeae* acquisition as well as preterm birth. BVAB1 has been shown to be associated with BV persistence after metronidazole treatment and increased vaginal inflammation, and to confer a higher risk of puerperal infections. To date, no genome of BVAB1 is available, which has made it difficult to understand its disease-associated features. We present here a comparative analysis of seven metagenome-assembled genomes (MAGs) of BVAB1, derived from the cervicovaginal lavages of seven separate women. One metagenome was sequenced with long-read technology on a PacBio Sequel II instrument while the others were sequenced using the Illumina HiSeq platform. The MAGs were 1.5-1.7 Mb long, encoding an average of 1,499 genes and had >98% average nucleotide identity to each other. CheckM-estimated genome completion was 98.2%. We propose to rename BVAB1 to *Lachnovaginosum* genomospecies based on a phylogenetic analysis, and provide genomic evidence that this species may metabolize D-lactate, produce trimethylamine (the chemical responsible for BV-associated odor), and be motile. These MAGs will be a valuable resource and will contribute to our understanding of the heterogeneous etiologies of bacterial vaginosis.

## Introduction

Bacterial vaginosis (BV) is a common vaginal infection affecting approximately 21 million or 30% of US reproductive-aged women in 2001-2004, with both African- and Mexican-Americans disproportionately afflicted [2, 3]. The condition is difficult to treat with antibiotics and the rate of recurrence is high [4, 5]. Microbiologically, BV diagnosis is established using Nugent scoring of Gram-stained vaginal smears and is defined by a low abundance of *Lactobacillus* spp. morphotypes, and a high abundance of anaerobic Gram-negative species and/or the presence of clue cells [6]. Clinically, diagnosis of BV is made when 3 of the 4 Amsel's criteria are met: vaginal pH > 4.5, homogenous vaginal discharge, a positive whiff test, and the presence of clue cells upon wet mount examination [7]. Aside from the burdensome symptoms of vaginal discharge and fishy odor, BV is also associated with increased risk to adverse health outcomes including preterm birth [8], and increased risk of sexually transmitted infections acquisition and transmission, including HIV [9, 10].

A critical step along the path to understanding the ecology and pathogenic potential of a bacterial species is the characterization of its genome. Yet many of these BV associated bacteria have eluded attempts at cultivation, further complicating genome sequencing efforts. BV-associated bacterium 1 (BVAB1) is one such organism for which there is limited genetic information available. Based on 16S ribosomal RNA (rRNA) gene amplicon high-throughput sequencing, BVAB1 belongs to the family *Lachnospiraceae* and is often misidentified as belonging to the genus *Shuttleworthia*. BVAB1 has been associated with both symptomatic and asymptomatic bacterial vaginosis (asymptomatic BV occurs when 3 of 4 Amsel's criteria are met, but the patient reports no symptoms) [11]. Interestingly, Gram-negative curved rods designated *Mobiluncus* morphotypes on Gram stain in Nugent scoring have been shown to most likely be BVAB1 [12]. Further, the vaginal communities containing this particular bacterial ribotype have been associated with vaginal inflammation and persistent BV [13]. BVAB1 remains uncultured and aside from detection of this species via partial 16S rRNA gene amplicon sequencing, little is known about the metabolism, pathogenic potential, or ecology of BVAB1 in

the vaginal environment, especially during BV. Further understanding of the genetic and physiological properties of BV-associated bacteria will help to dissect complex etiology of BV. There currently is no available draft genome for this bacterium.

In this study, we reconstructed seven BVAB1 metagenome-assembled genomes (MAGs) originating from different women with symptomatic and asymptomatic BV. To enable the assembly of high-quality MAGs, we used a sequencing strategy that relied on both Illumina HiSeq and PacBio Sequel II long reads. Based on phylogenetic analysis of full-length 16S rRNA gene sequences obtained from the genomic assemblies, we propose to rename the bacterium *Lachnovaginosum* genomospecies.

## Methods

### *Ethics*

Samples used in this study were archived cervicovaginal lavages and swabs obtained in accordance with the protocols approved by the University of Maryland Baltimore Institutional Review Board.

### *Sample Collection*

Vaginal samples used in this study were previously screened and confirmed to contain a high relative abundance (> 70%) of BVAB1 using 16S rRNA gene amplicon sequencing of the V3-V4 regions as previously reported [14]. Cervicovaginal lavages from six participants were collected as part of the NIH Longitudinal Study for Vaginal Flora (LSVF) [15] by washing the vaginal walls with 3 mL sterile, deionized water, and aspiration from the vaginal vault via pipette. Specimen were placed into a plastic tube and frozen at -20°C, and then transferred to -80°C until processing. An additional swab sample collected as part of the UMB-HMP study was used in this study [16]. The swab was self-collected by a participant using a vaginal ESwab and re-suspended into 1mL Amies transport medium (ESwab, Copan Diagnostics Inc.), frozen at -20°C for no more than a week, and transferred to -80°C until analyzed. DNA was extracted from 200 µL of swab or lavage fluid using the MagAttract Microbial DNA Kit (QIAGEN Inc., Germantown MD) automated on a Hamilton Star robotic platform. DNA was eluted in a final volume of 110 µL nuclease-free water.

### *Metagenomic library construction and sequencing on the Illumina HiSeq 4000 platform*

Metagenomic libraries for the six LSVF samples were prepared using the KAPA HyperPlus Kit (Kapa Biosystems, Wilmington MA) with KAPA Single-Indexed Adapter Kit Set B. A fixed volume (35 µL) of genomic DNA was used as input, and libraries were prepared following the manufacturer's protocol with modifications based on their amount of input DNA as in **Supplementary File 1**. For samples with 0.5 or 0.2 ng input DNA, the fragmentation enzyme was diluted 1:2 or 1:5 with water. All samples were fragmented at 37°C for 5 min. Adapter concentrations varied according to the input DNA as listed in **Supplementary File 1**, and the adapter ligation was carried out overnight at 4°C for all samples. The post-ligation cleanup was performed with 0.8X Ampure XP beads (Beckman Coulter, Indianapolis IN) and 20 µL of sample was used in library amplification. Amplification library cycles varied by input DNA as listed in **Supplementary File 1**. Post-amplification cleanup was performed with 1x Ampure XP beads; libraries with remaining adapter dimer peaks were cleaned a second time. The final elution was in 25 µL of nuclease-free water. Libraries were run on a TapeStation instrument with a D1000 tape (Agilent, Santa Clara CA) to assess quality and concentration. Each library was sequenced on an Illumina HiSeq 4000 instrument using the 150 bp paired-end protocol.

### *Quality filtering, host-read removal, and metagenomic-assembled genome reconstruction*

Metagenomic reads were quality filtered using Trimmomatic v0.36 [17] to remove sequencing adapters allowing for 2 mismatches, a palindromic clip threshold of 30, and a simple clip threshold of 10. Bases with quality scores < 3 were removed from the beginning and end of reads, and a 4 bp sliding window which trimmed a read if the average quality score within that window fell below 15. Reads < 75 bp in length were removed. Host reads were detected by mapping to the human genome GRCh38.p12 with Bowtie 2 v2.3.4.1 and default settings [18], followed by removal using samtools v1.9 [19] and bedtools v2.27.1 [20, 21] (see **Supplementary File 2** for specific code). Metagenomic assemblies were produced using MegaHit v1.1.3 [22] with the meta-sensitive setting, and read mapping to assemblies was performed using Bowtie 2 v2.3.4.1 and default settings [18]. Contigs > 2.5 kb were binned based on hierarchical clustering of contig tetranucleotide frequencies and coverage using Anvi'o (version 5.2) [23]. Bins with the highest coverage in the sample which also had the lowest GC content were observed in all samples and were chosen and extracted as candidate BVAB1 MAGs (see **Supplementary File 3** for Anvi'o images of extracted bins). MAGs were annotated using PROKKA v1.13 [24]. MAG completion and contamination estimates were calculated using CheckM v1.0.12 [25]. Phages were detected using PHAST [26].

#### *Metagenomic library construction and sequencing on the PacBio Sequel II platform*

The sample collected from the UMB-HMP study [16] had sufficient DNA content for long-read sequencing using the Pacific Biosciences Sequel II platform. Library pools were prepared with SMRTBell Template Prep Kit 1.0 with barcoded adaptors. Libraries were size-selected on a BluePippen (Sage Science, Beverly, MA) with a cutoff of 5 kb. Sequencing was performed on a Sequel II instrument (Pacific Biosciences, Menlo Park, CA) at the Genomic Resource Center of the University Maryland School of Medicine with a loading at 60 pM.

#### *Quality filtering, host-read removal, and metagenomic-assembled genome reconstruction*

Circular consensus sequencing (CCS) reads were generated using the PacBio CCS application with minPredictedAccuracy=0.99 and the rest of the parameters were set to default, including minimum 3 subread passes. Demultiplexing was done with *lima* (version 1.9.0) using default parameters except for minimum barcode score and min length which were set at 26 and 50 bp respectively. Both tools are part of the SMRTLink 6.0.1 software package with updated CCS version 3.4.1. Human CCS reads were detected and removed using BMTagger [27] and the human genome build 38 patch release 12 (GRCh38.p12). Remaining CCS reads were assembled via Canu v1.8 and the “-pacbio-raw” protocol [28]. Resulting contigs were taxonomically annotated using BLASTN v 2.8.1 [29] and the NCBI non-redundant nucleotide database (updated 2019/05/03) to remove all contigs identified as known vaginal taxa. Contigs were further extended when possible using Circlator 1.5.5 [30]. Based on the GC content of the LSVF MAGs (mean 31%), contigs with median GC content of ≤ 36% were used to produce the UMB-HMP MAG. The contigs were then ordered by decreasing size. The MAG was annotated using PROKKA v1.13 [24]. Phages were detected using PHAST [26]. MAG completion and contamination estimates were calculated using CheckM v1.0.12 [25].

#### *Metabolomic Data*

Metabolomics analysis was conducted as described in [31] by Metabolon Inc. (Morrisville, NC) using 200 µL of lavage sample (sample from LSVF) or 200 µL of a frozen dry swab eluted in 1 ml of PBS (UMB-HMP sample [16]). The abundances of 561 compounds were quantified using Ultrahigh Performance Liquid Chromatography-Tandem Mass Spectroscopy (UPLC-MS/MS). Quantities were corrected for instrument block variability and reported as normalized area-under-the-curve estimates. Figures were generated using ggplot2 [32].

#### *Comparative genome and phylogenetic analyses*

The UMB-HMP MAG served as a reference to order the contigs of the LSVF MAGs using the Mauve Contig Mover [33]. Average nucleotide identities were calculated using FastANI v1.1 with fragment lengths of 1,000 bp which was mean length of coding sequences [34]. A circle plot was constructed with the BLAST Ring Image Generator v0.95 [35] using the PacBio MAG as reference. Maximum-likelihood phylogenetic trees of full-length 16S rRNA gene sequences alignments were generated with ClustalW [36] and FastTree v2.1.5 [37, 38] in Geneious v9.0 (<https://www.geneious.com>). Trees were rooted with *Fusobacterium nucleatum* (AJ133496) and *Propionigenium modestum* (X54275) [39], and members of the genus *Lachnoclostridium* were included as neighbors [40].

## Results and Discussion

### *Participant information*

All six participants in the LSVF study were of reproductive age and had high Nugent scores (6-10). Four were diagnosed with asymptomatic Amsel-BV, 1 with symptomatic Amsel-BV, and 1 was not diagnosed with BV [41]. The woman who participated in the UMB-HMP study [16] had a Nugent score of 8 and was diagnosed with asymptomatic BV. The vaginal microbiota of these 7 samples had >60% BVAB1 as defined by 16S rRNA gene V3-V4 amplicon sequencing (**Table 1**) and were used for metagenomic reconstruction of the BVAB1 MAGs.

### *Overall genomic features*

The BVAB 1 draft assembly from the sample sequenced on the PacBio Sequel II comprises of 17 contigs which total 1.57 Mb in size with 31.9% GC content, and is herein termed the “reference MAG”. The BVAB1 MAG constructed using the Illumina HiSeq 4000 metagenomic sequence data were 1.54-1.70 Mb in size (mean: 1.62 Mb) with 27-35 contigs (mean N50: 99,623 bp) and 31.3% GC (**Table 2**). Genome annotation indicated the presence of four complete rRNA operon copies in the reference MAG. Partial rRNA operons were observed the Illumina-based MAGs.

### *Phylogenetic Analysis*

A phylogenetic analysis using the full-length 16S rRNA genes revealed BVAB1 belongs in the *Clostridiales* family *Lachnospiraceae*, and that *Shuttleworthia satelles* is the closest known relative of BVAB1, though nucleotide identity is only 89-90% (**Figure 1**). Relative to each other, the BVAB1 16S rRNA genes were >99.7% similar and the MAG average nucleotide identity was also high (98.6-99.1%, **Table 3**). At the genome level, the ANI of the BVAB1 MAGs and the *Shuttleworthia satelles* draft genome (GCF000160115) was on average 74.7%. We, therefore, propose a new genus for BVAB1 which represents the phylogenetic placement, the source of these particular MAGs, and the as yet uncultivated nature of this species: *Lachnovaginosum* genomospecies.

### *Specific genomic features of Lachnovaginosum genomospecies*

Several genomic features were conserved across the reference genome and the 6 MAGs (**Figures 2 & 3**). Regarding *Lachnovaginosum* genomospecies metabolism, genes encoding transporter for mannose, fructose, and L-ascorbate were identified in all MAGs, as well as a D-lactate dehydrogenase gene but not an L-lactate dehydrogenase gene. This result was unexpected, as the production of D-lactate in the vaginal environment is thought to be a key and somewhat unique feature of certain *Lactobacillus* spp. [42, 43]. Metabolomic data for each sample were explored for the presence of lactate to provide evidence of this potential genomic finding. While lactate was observed in most samples, its abundance was substantially lower than that from representative samples that were dominated by *Lactobacillus crispatus* (CST I), a



known D-lactate producer (**Figure 4**). Thus, either the enzyme exhibits lower activity in *Lachnovaginosum* genomospecies or is instead used in the reverse reaction to consume *Lactobacillus* spp.-produced D-lactate to produce pyruvate. This is a strategy described for another vaginal anaerobic Gram-negative coccus, *Veillonella parvula*, which is able to grow on lactate as the sole source of carbon [44]. This would possibly contribute to an increase in vaginal pH, thereby creating a more favorable growth environment. Instead, succinate was the more abundant potential fermentation end product in the communities from which *Lachnovaginosum* genomospecies' genomes originated. Nonetheless, succinate is associated with bacterial vaginosis, a condition in which *Lachnovaginosum* genomospecies is often found [45]. Interestingly, all *Lachnovaginosum* genomospecies MAGs lack all steps of the tricarboxylic acid cycle. As a consequence, *Lachnovaginosum* genomospecies is certainly unable to produce succinate and it is possible that *Lachnovaginosum* genomospecies produces a substrate another species in the community can convert into succinate. Mannose was also noticeably absent in all of the samples, suggesting that it, too, could be a carbohydrate source for *Lachnovaginosum* genomospecies, which is also supported by the presence of mannose transporter genes on the MAGs (**Figure 3**).

In addition, the full suite of genes required for flagella assembly was observed in all MAGs, as well as genes required for methyl-accepting chemotaxis and the downstream signal process that mediates flagellar response [46]. Flagella have yet to be visually observed on *Lachnovaginosum* genomospecies (**Figure 5**). Other interesting genes include efflux pumps for both macrolides and fluoroquinolones, as well as those encoding hemolysins, which would suggest direct interaction between *Lachnovaginosum* genomospecies and host tissues. Additionally, choline transporters and the *cutC* and *cutD* genes were found in all MAGs, however, the *cutD* gene is absent from the reference MAG. The *cut* genes metabolize choline and produce trimethylamine (TMA) [47], one of the substances believed to be responsible for the fishy odor associated with bacterial vaginosis [48]. TMA was in greater abundance in the metabolomes of these samples relative to those from *Lactobacillus crispatus* or *Gardnerella vaginalis* dominated communities (CST I and CST IV-B) (**Figure 4**).

Intact phages were detected in 3 MAGs, including the PacBio-produced reference genome (**Table 4**). Best BLAST hits indicate that all detected phages belong to the Siphoviridae family of double-stranded viruses which exhibit both lytic and lysogenic phases. Phages of this family have previously been reported in the vaginal species, *Lactobacillus jensenii* [49].

## Conclusions

We present here a collection of *Lachnovaginosum* genomospecies MAGs, previously known as BVAB1, an important member of the human vaginal microbiota associated with bacterial vaginosis and other adverse outcomes. Both the inability to culture this organism as well as its detection via a small region of the 16S rRNA gene sequence have led a limited understanding of its contributions to the vaginal microbiome and implications for its effect on reproductive health. We have shown the potential of this microbe to be motile in the environment most likely in response to nutritional cues, to resist antibiotics using efflux systems, and to contribute to the fishy odor characteristic of bacterial vaginosis. Further work on the characterization of *Lachnovaginosum* genomospecies will be necessary to establish its role in the vaginal microbiome.

### Declarations:

#### Availability of data and materials:

The datasets and supplementary materials generated and/or analyzed in the current study are available in the FigShare repository under doi: [10.6084/m9.figshare.8194595](https://doi.org/10.6084/m9.figshare.8194595).

#### Competing Interests:

The authors declare that they have no competing interests.

#### Funding:

J.B.H. was supported by the National Institute of Allergy and Infectious Diseases of the National Institutes of Health under award number F32AI136400. The research reported in this publication was supported in part by the National Institute of Allergy and Infectious Diseases of the National Institutes of Health under award numbers U19AI084044, R01AI116799, R01NR015495, and the Bill & Melinda Gates Foundation award OPP1189217.

#### Acknowledgments

The authors are grateful to the University of Maryland School of Medicine Genome Resource Center and Elizabeth O'Hanlon for providing the Gram-stained images.

## TABLES

Table 1. Participants demographics and cervicovaginal lavage microbial compositions for samples used in metagenomic reconstruction of *Lachnovaginosum* genomospecies metagenome-assembled genomes. Microbial compositions indicate from left to right: *Lachnovaginosum* genomospecies (pink), *Gardnerella vaginalis* (darker orange), *g\_Megasphaera* (darker blue), *Sneathia sanguinegens* (yellow), *g\_Prevotella* (green), *Atopobium vaginae* (lighter blue), *Prevotella amnii* (lighter orange), and Other (gray). Asym: asymptomatic BV; Sym: symptomatic BV.

| Sample ID      | Age  | Race  | Microbiota Relative Abundances of Cervicovaginal Lavage (16S rRNA Gene –V3V4)     | BV?  | Nugent Score | Vaginal pH | Clinician-Observed Discharge? | Positive Whiff Test? | Incident STI 3 months later? |
|----------------|------|-------|-----------------------------------------------------------------------------------|------|--------------|------------|-------------------------------|----------------------|------------------------------|
| 343442         | 37.8 | Black |  | No   | 6            | 6.5        | No                            | No                   | No                           |
| 342826         | 34.8 | Black |  | Asym | 10           | 5.3        | Mild visible – Grey/White     | Yes                  | No                           |
| 342587         | 36.6 | Black |  | Asym | 8            | 5.5        | Mild visible – Grey/White     | Yes                  | TV                           |
| 342495         | 24.5 | Black |  | Asym | 9            | 5.5        | No                            | Yes                  | No                           |
| 342491         | 27.5 | Black |  | Asym | 7            | 5.5        | Mild visible – “Mucousy”      | Yes                  | CT                           |
| 323896         | 34.4 | White |  | Sym  | 7            | 5.5        | Mild visible – Grey/White     | Yes                  | No                           |
| UMB-HMP Sample | 22   | -     |  | Asym | 8            | 5          | -                             | Yes                  | -                            |



Table 2. *Lachnovaginosum* genomospecies genome draft assembly characteristics. Completion and contamination evaluated by CheckM [1].

| Genome ID            | No. CDS | Total Length (Mb) | N50    | %GC  | % Complete | CheckM Contam | No. Contig | No. tRNAs | No. 5S rRNA | No. 16S rRNA | No. 23S rRNA |
|----------------------|---------|-------------------|--------|------|------------|---------------|------------|-----------|-------------|--------------|--------------|
| <b>Reference MAG</b> | 1,434   | 1.57              | 145756 | 31.8 | 98.28      | 0             | 5          | 37        | 4           | 4            | 4            |
| <b>343442</b>        | 1,421   | 1.54              | 75124  | 31.3 | 98.28      | 0             | 35         | 20        | 1           | 1            | 0            |
| <b>342826</b>        | 1,586   | 1.70              | 122755 | 31.1 | 98.28      | 0             | 29         | 19        | 1           | 1            | 0            |
| <b>342587</b>        | 1,428   | 1.57              | 103492 | 31.3 | 98.28      | 0             | 27         | 19        | 0           | 1            | 1            |
| <b>342495</b>        | 1,553   | 1.64              | 90657  | 31.3 | 98.28      | 0             | 31         | 19        | 1           | 1            | 0            |
| <b>342491</b>        | 1,586   | 1.69              | 95115  | 31.3 | 98.28      | 0             | 30         | 19        | 1           | 1            | 0            |
| <b>323896</b>        | 1,488   | 1.60              | 110599 | 31.6 | 98.28      | 0             | 35         | 19        | 1           | 1            | 1            |

Table 3. Average Nucleotide Identity (ANI) between each *Lachnovaginosum* genomospecies metagenome-assembled genomes and the *Shuttleworthia satelles* draft genome GCF000160115.

|                                       | <b>323896</b> | <b>342491</b> | <b>342495</b> | <b>342587</b> | <b>342826</b> | <b>343442</b> | <b>Reference Genome</b> |
|---------------------------------------|---------------|---------------|---------------|---------------|---------------|---------------|-------------------------|
| <b>342491</b>                         | 99.01         | -             | -             | -             | -             | -             | -                       |
| <b>342495</b>                         | 99.11         | 98.88         | -             | -             | -             | -             | -                       |
| <b>342587</b>                         | 99.02         | 98.81         | 98.85         | -             | -             | -             | -                       |
| <b>342826</b>                         | 98.89         | 99.10         | 99.02         | 99.11         | -             | -             | -                       |
| <b>343442</b>                         | 98.88         | 98.93         | 98.92         | 99.09         | 99.01         | -             | -                       |
| <b>Reference Genome</b>               | 98.83         | 98.60         | 98.86         | 98.86         | 98.73         | 98.80         | -                       |
| <b><i>Shuttleworthia satelles</i></b> | 74.86         | 74.21         | 74.27         | 74.66         | 75.88         | 74.34         | 74.31                   |

Table 4. Best blast hits and accession numbers of intact phage detected in *Lachnovaginosum* genomospecies metagenome-assembled genomes.

|                          | <b>Intact Phage</b> | <b>Accession No.</b> |
|--------------------------|---------------------|----------------------|
| <b>323896</b>            | Staphy_80           | NC_030652            |
| <b>342491</b>            | None                | -                    |
| <b>342495</b>            | Clostr_phiMMP03     | NC_028959            |
| <b>342587</b>            | None                | -                    |
| <b>342826</b>            | None                | -                    |
| <b>343442</b>            | None                | -                    |
| <b>Reference<br/>MAG</b> | Staphy_80           | NC_030652            |

## FIGURES

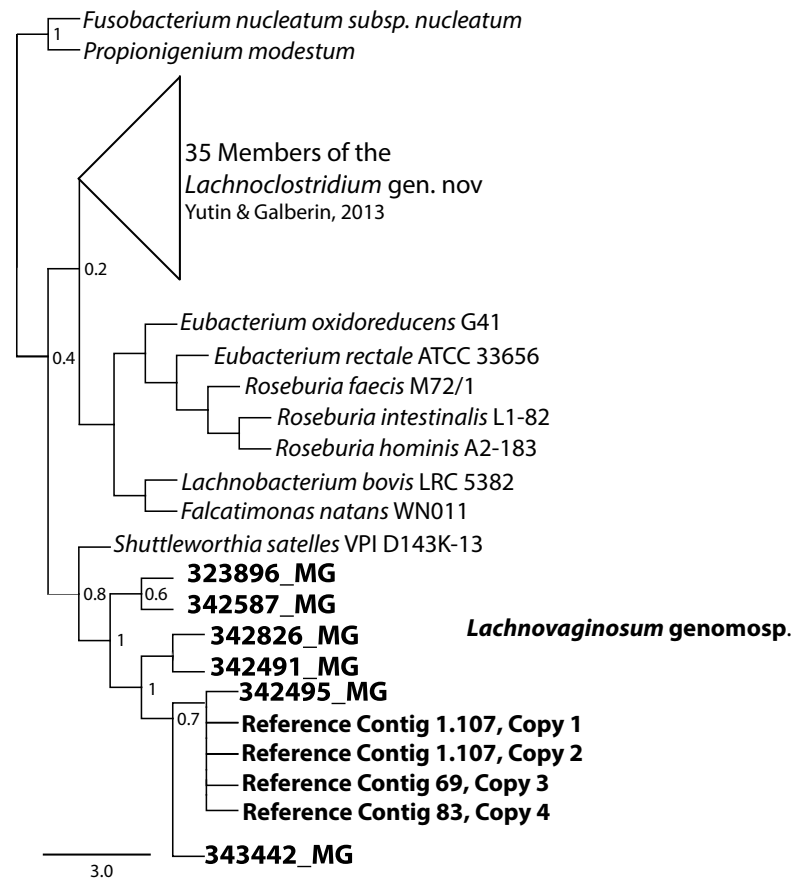

Figure 1. *Lachnovaginosum* genomospecies is related to *Shuttleworthia satelles*. The full-length 16S rRNA gene sequences are 89-90% identical. *Lachnovaginosum* genomospecies sequences, in bold, are >98.6% identical to each other.

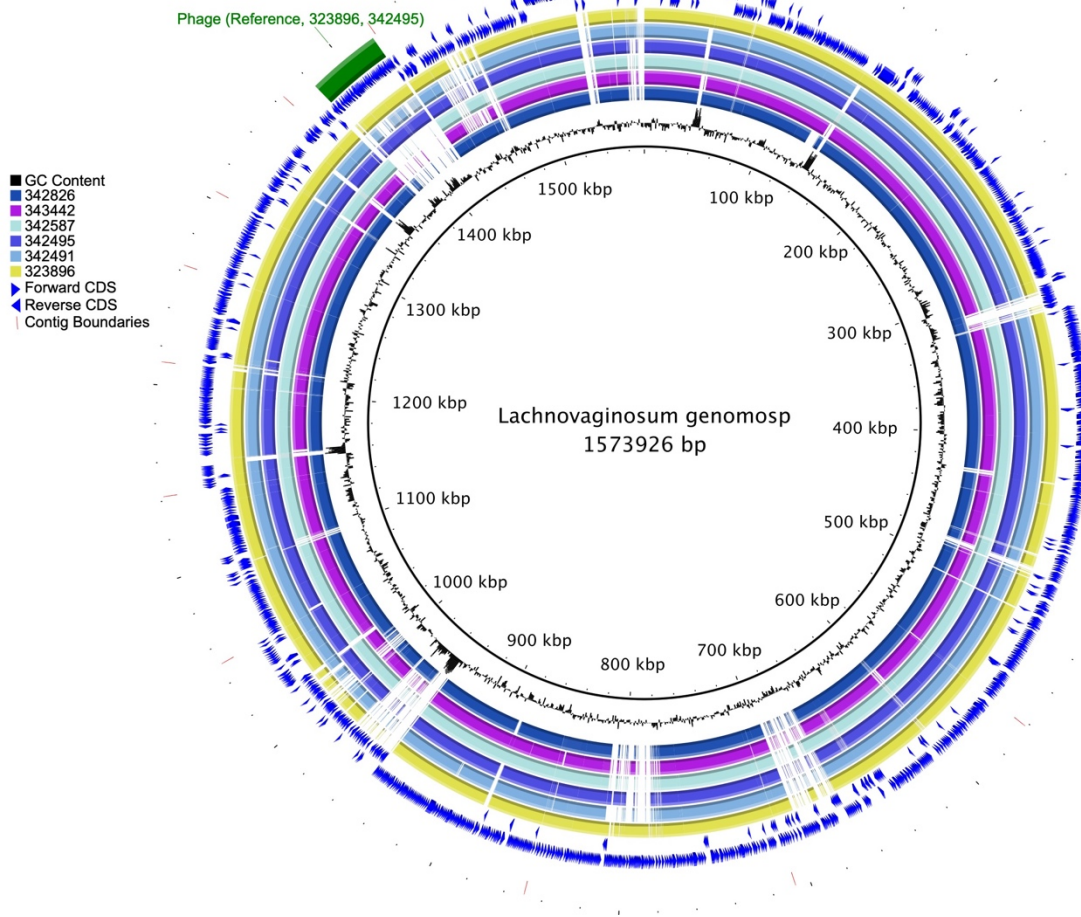

Figure 2. Circle plot comparing the *Lachnovaginosum* genomosp. metagenome-assembled genomes. The MAG sequenced on the Sequel II platform is the reference. Circles are from inside to outside: 1) genome size, 2) GC content, followed by MAGs 3) 342826 4) 343442, 5) 342587, 6) 342495, 7) 342491, 8) 323896 and finally 9) forward-direction coding sequences, 9) reverse-direction coding sequences, 10) phage detected in reference genome (green bar), and 11) contig boundaries for reference genome.

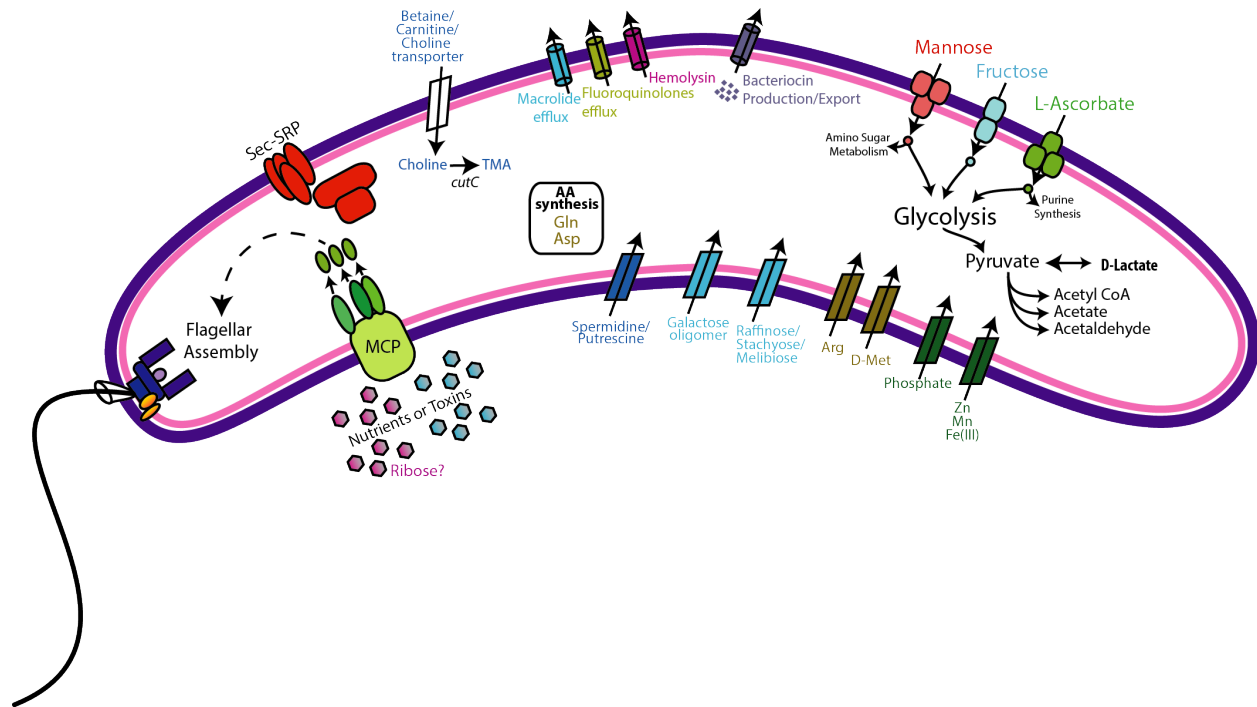

Figure 3. Genomic features of *Lachnovaginosum* genomespecies. Genes coding for the following functions were conserved across all genomes: Methyl-accepting chemotaxis (MCP) and subsequent flagella assembly, Sec-SRP secretion systems, choline import and metabolism, bacteriocin production and export, mannose, fructose, and L-ascorbate transport and metabolism, D-lactate dehydrogenase and biosynthesis of only 2 amino acids.



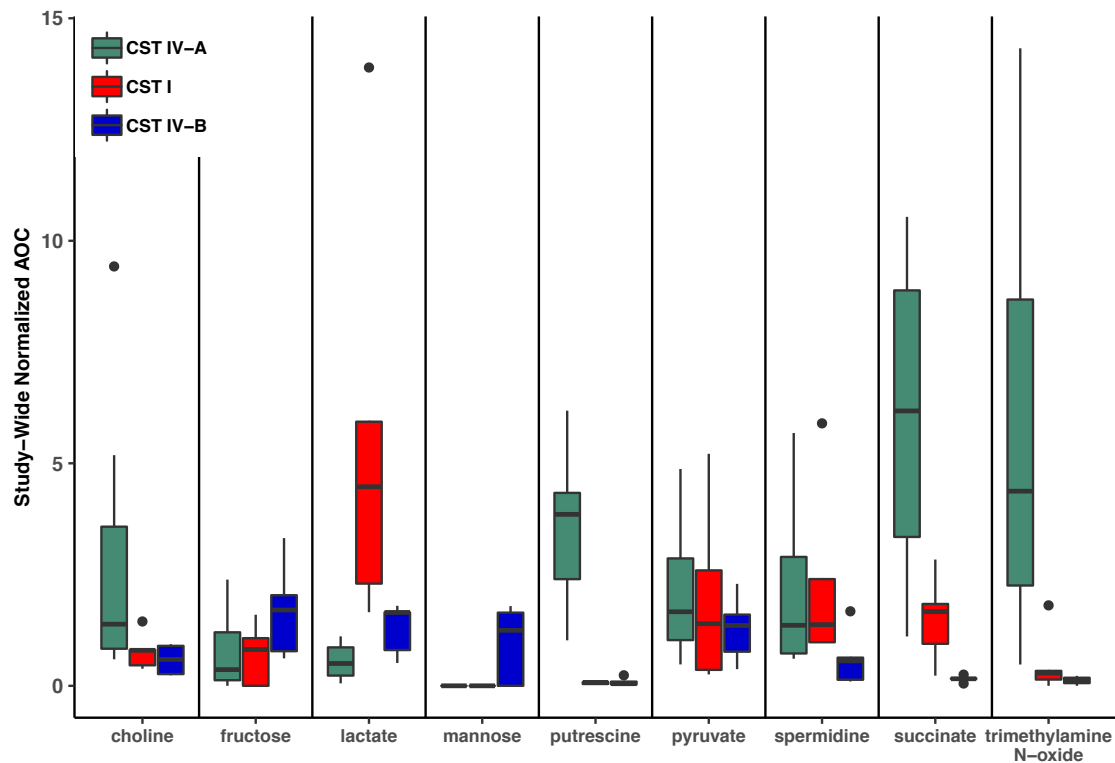

Figure 4. Metabolomic signatures for biochemicals of interest in samples from samples of vaginal community state type (CST) IV-A (relatively high abundances of *Lachnovaginosum* genomospecies), CST I (dominated by *Lactobacillus crispatus*) and CST IV-B (*Gardnerella vaginalis*).

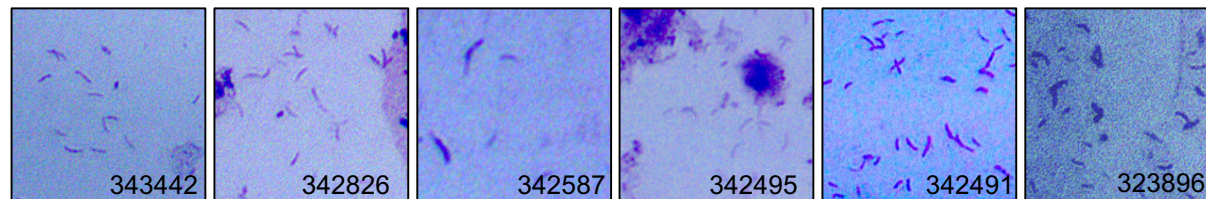

Figure 5. Gram stains of LSVF samples containing >70% *Lachnovaginosum* genospecies and used in this study. Morphologically *Lachnovaginosum* genospecies is a curved rod. Images are labeled with sample ID.

## References:

1. Parks DH, Imelfort M, Skennerton CT, Hugenholtz P, Tyson GW: **CheckM: assessing the quality of microbial genomes recovered from isolates, single cells, and metagenomes.** In: *Genome Res.* vol. 25; 2015: 1043-1055.
2. Koumans EH, Sternberg M, Bruce C, McQuillan G, Kendrick J, Sutton M, Markowitz LE: **The prevalence of bacterial vaginosis in the United States, 2001-2004; associations with symptoms, sexual behaviors, and reproductive health.** *Sex Transm Dis* 2007, **34**(11):864-869.
3. Allsworth JE, Peipert JF: **Prevalence of bacterial vaginosis: 2001-2004 National Health and Nutrition Examination Survey data.** *Obstet Gynecol* 2007, **109**(1):114-120.
4. Bradshaw CS, Morton AN, Hocking J, Garland SM, Morris MB, Moss LM, Horvath LB, Kuzevska I, Fairley CK: **High recurrence rates of bacterial vaginosis over the course of 12 months after oral metronidazole therapy and factors associated with recurrence.** *J Infect Dis* 2006, **193**(11):1478-1486.
5. Schwebke JR, Desmond RA: **A randomized trial of the duration of therapy with metronidazole plus or minus azithromycin for treatment of symptomatic bacterial vaginosis.** *Clin Infect Dis* 2007, **44**(2):213-219.
6. Nugent RP, Krohn MA, Hillier SL: **Reliability of diagnosing bacterial vaginosis is improved by a standardized method of gram stain interpretation.** *J Clin Microbiol* 1991, **29**(2):297-301.
7. Amsel R, Totten PA, Spiegel CA, Chen KC, Eschenbach D, Holmes KK: **Nonspecific vaginitis. Diagnostic criteria and microbial and epidemiologic associations.** *Am J Med* 1983, **74**(1):14-22.
8. Leitich H, Bodner-Adler B, Brunbauer M, Kaider A, Egarter C, Husslein P: **Bacterial vaginosis as a risk factor for preterm delivery: a meta-analysis.** *American journal of obstetrics and gynecology* 2003, **189**(1):139-147.
9. Atashili J, Poole C, Ndumbe PM, Adimora AA, Smith JS: **Bacterial vaginosis and HIV acquisition: a meta-analysis of published studies.** *AIDS* 2008, **22**(12):1493-1501.
10. Cohen CR, Lingappa JR, Baeten JM, Ngayo MO, Spiegel CA, Hong T, Donnell D, Celum C, Kapiga S, Delany S *et al*: **Bacterial vaginosis associated with increased risk of female-to-male HIV-1 transmission: a prospective cohort analysis among African couples.** *PLoS Med* 2012, **9**(6):e1001251.
11. Fredricks DN, Fiedler TL, Marrazzo JM: **Molecular Identification of Bacteria Associated with Bacterial Vaginosis.** In: <http://dxdoiorg/101056/NEJMoa043802>. vol. 353: Massachusetts Medical Society; 2008: 1899-1911.
12. Srinivasan S, Morgan MT, Liu C, Matsen FA, Hoffman NG, Fiedler TL, Agnew KJ, Marrazzo JM, Fredricks DN: **More than meets the eye: associations of vaginal bacteria with gram stain morphotypes using molecular phylogenetic analysis.** *PLoS One* 2013, **8**(10):e78633.
13. Lennard K, Dabee S, Barnabas SL, Havyarimana E, Blakney A, Jaumdally SZ, Botha G, Mkhize NN, Bekker LG, Lewis DA *et al*: **Microbial Composition Predicts Genital Tract Inflammation and Persistent Bacterial Vaginosis in South African Adolescent Females.** *Infect Immun* 2018, **86**(1).

14. Holm JB, Humphrys M, Robinson CK, Settles ML, Ott S, Fu L, Yang H, Gajer P, He X, McComb EJ *et al*: **Ultra-high throughput multiplexing and sequencing of >500 bp amplicon regions on the Illumina HiSeq 2500 platform.** *bioRxiv* 2018.
15. Brotman RM, Klebanoff MA, Nansel TR, Yu KF, Andrews WW, Zhang J, Schwebke JR: **Bacterial Vaginosis Assessed by Gram Stain and Diminished Colonization Resistance to Incident Gonococcal, Chlamydial, and Trichomonal Genital Infection.** In: *J Infect Dis.* vol. 202: Oxford University Press; 2010: 1907-1915.
16. Ravel J, Brotman RM, Gajer P, Ma B, Nandy M, Fadrosh DW, Sakamoto J, Koenig SS, Fu L, Zhou X *et al*: **Daily temporal dynamics of vaginal microbiota before, during and after episodes of bacterial vaginosis.** In: *Microbiome.* vol. 1: BioMed Central; 2013: 29.
17. Bolger AM, Lohse M, Usadel B: **Trimmomatic: a flexible trimmer for Illumina sequence data.** *Bioinformatics* 2014, **30**(15):2114-2120.
18. Langmead B, Salzberg SL: **Fast gapped-read alignment with Bowtie 2.** *Nat Methods* 2012, **9**(4):357-359.
19. Li H, Handsaker B, Wysoker A, Fennell T, Ruan J, Homer N, Marth G, Abecasis G, Durbin R, Genome Project Data Processing S: **The Sequence Alignment/Map format and SAMtools.** *Bioinformatics* 2009, **25**(16):2078-2079.
20. Quinlan AR: **BEDTools: The Swiss-Army Tool for Genome Feature Analysis.** *Curr Protoc Bioinformatics* 2014, **47**:11 12 11-34.
21. Quinlan AR, Hall IM: **BEDTools: a flexible suite of utilities for comparing genomic features.** *Bioinformatics* 2010, **26**(6):841-842.
22. Li D, Luo R, Liu CM, Leung CM, Ting HF, Sadakane K, Yamashita H, Lam TW: **MEGAHIT v1.0: A fast and scalable metagenome assembler driven by advanced methodologies and community practices.** *Methods* 2016, **102**:3-11.
23. Eren AM, Esen OC, Quince C, Vineis JH, Morrison HG, Sogin ML, Delmont TO: **Anvi'o: an advanced analysis and visualization platform for 'omics data.** *PeerJ* 2015, **3**:e1319.
24. Seemann T: **Prokka: rapid prokaryotic genome annotation.** *Bioinformatics* 2014, **30**(14):2068-2069.
25. Parks DH, Imelfort M, Skennerton CT, Hugenholtz P, Tyson GW: **CheckM: assessing the quality of microbial genomes recovered from isolates, single cells, and metagenomes.** *Genome Res* 2015, **25**(7):1043-1055.
26. Zhou Y, Liang Y, Lynch KH, Dennis JJ, Wishart DS: **PHAST: a fast phage search tool.** *Nucleic Acids Res* 2011, **39**(Web Server issue):W347-352.
27. Rotmistrovsky K, Agarwala R: **BMTagger: Best Match Tagger for removing human reads from metagenomics datasets.** 2011.
28. Koren S, Walenz BP, Berlin K, Miller JR, Bergman NH, Phillippy AM: **Canu: scalable and accurate long-read assembly via adaptive k-mer weighting and repeat separation.** *Genome Res* 2017, **27**(5):722-736.
29. Altschul SF, Gish W, Miller W, Myers EW, Lipman DJ: **Basic local alignment search tool.** *J Mol Biol* 1990, **215**(3):403-410.
30. Hunt M, Silva ND, Otto TD, Parkhill J, Keane JA, Harris SR: **Circlator: automated circularization of genome assemblies using long sequencing reads.** *Genome Biol* 2015, **16**:294.

31. Nelson TM, Borgogna JC, Michalek RD, Roberts DW, Rath JM, Glover ED, Ravel J, Shardell MD, Yeoman CJ, Brotman RM: **Cigarette smoking is associated with an altered vaginal tract metabolomic profile.** *Sci Rep* 2018, **8**(1):852.
32. Wickham H: **Ggplot2 : elegant graphics for data analysis.** New York: Springer; 2009.
33. Rissman AI, Mau B, Biehl BS, Darling AE, Glasner JD, Perna NT: **Reordering contigs of draft genomes using the Mauve aligner.** *Bioinformatics* 2009, **25**(16):2071-2073.
34. Jain C, Rodriguez RL, Phillippy AM, Konstantinidis KT, Aluru S: **High throughput ANI analysis of 90K prokaryotic genomes reveals clear species boundaries.** *Nat Commun* 2018, **9**(1):5114.
35. Alikhan NF, Petty NK, Ben Zakour NL, Beatson SA: **BLAST Ring Image Generator (BRIG): simple prokaryote genome comparisons.** *BMC Genomics* 2011, **12**:402.
36. Thompson JD, Higgins DG, Gibson TJ: **CLUSTAL W: improving the sensitivity of progressive multiple sequence alignment through sequence weighting, position-specific gap penalties and weight matrix choice.** *Nucleic Acids Res* 1994, **22**(22):4673-4680.
37. Price MN, Dehal PS, Arkin AP: **FastTree 2--approximately maximum-likelihood trees for large alignments.** *PLoS One* 2010, **5**(3):e9490.
38. Price MN, Dehal PS, Arkin AP: **FastTree: computing large minimum evolution trees with profiles instead of a distance matrix.** *Mol Biol Evol* 2009, **26**(7):1641-1650.
39. Domingo MC, Huletsky A, Boissinot M, Helie MC, Bernal A, Bernard KA, Grayson ML, Picard FJ, Bergeron MG: **Clostridium lavalense sp. nov., a glycopeptide-resistant species isolated from human faeces.** *Int J Syst Evol Microbiol* 2009, **59**(Pt 3):498-503.
40. Yutin N, Galperin MY: **A genomic update on clostridial phylogeny: Gram-negative spore formers and other misplaced clostridia.** *Environ Microbiol* 2013, **15**(10):2631-2641.
41. McKinnon LR, Achilles SL, Bradshaw CS, Burgener A, Crucitti T, Fredricks DN, Jaspán HB, Kaul R, Kaushic C, Klatt N *et al*: **The Evolving Facets of Bacterial Vaginosis: Implications for HIV Transmission.** *AIDS Res Hum Retroviruses* 2019, **35**(3):219-228.
42. Witkin SS, Mendes-Soares H, Linhares IM, Jayaram A, Ledger WJ, Forney LJ: **Influence of vaginal bacteria and D- and L-lactic acid isomers on vaginal extracellular matrix metalloproteinase inducer: implications for protection against upper genital tract infections.** *MBio* 2013, **4**(4).
43. France MT, Mendes-Soares H, Forney LJ: **Genomic comparisons of Lactobacillus crispatus and Lactobacillus iners reveal potential ecological drivers of community composition in the vagina.** In: *Applied and Environmental Microbiology*. vol. 82: American Society for Microbiology; 2016: AEM.02385-02316-07073.
44. Gronow S, Welnitz S, Lapidus A, Nolan M, Ivanova N, Glavina Del Rio T, Copeland A, Chen F, Tice H, Pitluck S *et al*: **Complete genome sequence of Veillonella parvula type strain (Te3).** *Stand Genomic Sci* 2010, **2**(1):57-65.
45. Srinivasan S, Morgan MT, Fiedler TL, Djukovic D, Hoffman NG, Raftery D, Marrazzo JM, Fredricks DN: **Metabolic signatures of bacterial vaginosis.** *MBio* 2015, **6**(2).
46. Bren A, Eisenbach M: **How signals are heard during bacterial chemotaxis: protein-protein interactions in sensory signal propagation.** *J Bacteriol* 2000, **182**(24):6865-6873.

47. Martinez-del Campo A, Bodea S, Hamer HA, Marks JA, Haiser HJ, Turnbaugh PJ, Balskus EP: **Characterization and detection of a widely distributed gene cluster that predicts anaerobic choline utilization by human gut bacteria.** *MBio* 2015, **6**(2).
48. Brand JM, Galask RP: **Trimethylamine: the substance mainly responsible for the fishy odor often associated with bacterial vaginosis.** *Obstet Gynecol* 1986, **68**(5):682-685.
49. Martin R, Escobedo S, Suarez JE: **Induction, structural characterization, and genome sequence of Lv1, a prophage from a human vaginal *Lactobacillus jensenii* strain.** *Int Microbiol* 2010, **13**(3):113-121.
